# Supplementary material
Source: PubMed Central journal article supplement (PMC3490596)
Supplement: supp_pp.112.201442_201442supp.pdf [file supp_pp.112.201442_201442supp.pdf]

**SUPPLEMENTAL MATERIAL**

**Supplemental Figures**

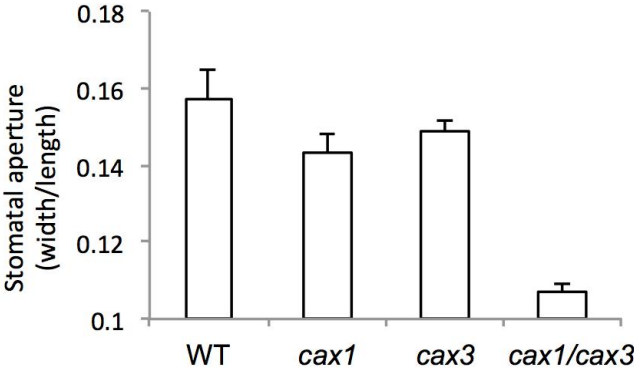

**Supplemental Figure 1.**

Steady-state stomatal apertures in WT, *cax1*, *cax3*, and *cax1/cax3* mutants. Data are mean  $\pm$  SEM (n = 3 independent experiments, > 80 stomata for each data point).

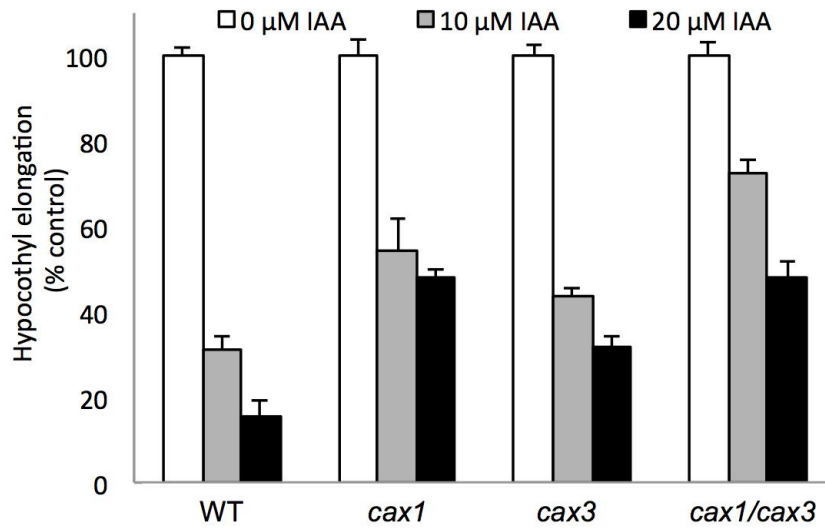

**Supplemental Figure 2.**

IAA-inhibition of hypocotyl elongation in WT, *cax1*, *cax3*, and *cax1/cax3*. Seedlings were grown under yellow light ( $35 \mu\text{molm}^{-2}\text{s}^{-1}$ ) at various IAA concentrations, and hypocotyl length was measured 5 days after growing in a growth chamber. Data are from three independent experiments (> 50 seedlings at each data point). Error bars, SEM

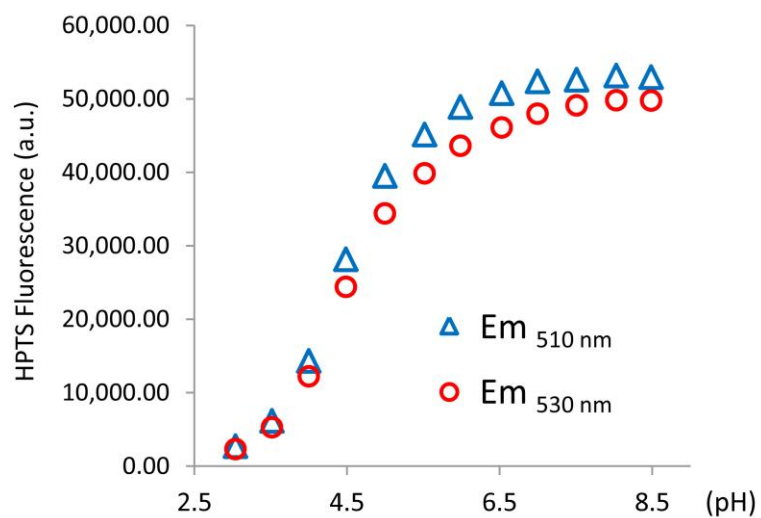

**Supplemental Figure 3.**

Fluorescence intensity of 8-hydroxypyrene-1,3,6-trisulfonic acid, trisodium salt (HPTS) as a function of pH. Excitation was set to 460 nm, and emission wavelength was collected at both 510 ( $\Delta$ ) and 530 ( $\bullet$ ) nm.

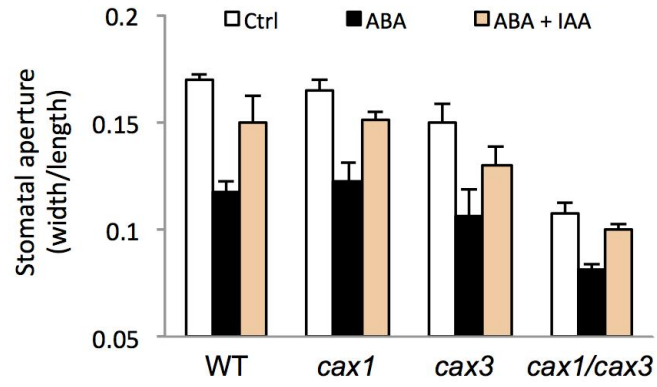

**Supplemental Figure 4.**

Steady-state stomatal apertures in WT, *cax1*, *cax3*, and *cax1/cax3* mutants. Apoplastic pH was set to 5.6. Data are mean  $\pm$  SEM (n = 3 independent experiments, > 80 stomata for each data point).

## Supplemental Table 1

| Target | Forward sequence               | Reverse sequence              |
|--------|--------------------------------|-------------------------------|
| ACTIN2 | GGCCGATGGTGAGGATATGCCACTTG     | TCGATGGACCTGACTCATCGTACTCACTC |
| CAX1   | GACCTCCGAGTGATTTCAGAAGGTTCCATA | TGTTGCAGTGACGACATTGTTTCATCGC  |
| CAX3   | AGAACGGAAACGCAAACGTGACC        | GCTAGAGAGCTAGTTTCAAGGATGTT    |
| CBP    | ATGGGTCTTGAAGTTGGGTCCTTATGC    | ATGGGATCCTTGAGGTACTTGAATAA    |
| HPRP   | ATATTACCGAAAAGCGGAGGAGGT       | CACCTAAATACATTCCACACCCTAAG    |
